# Supplementary material for: Synthesis, structure and near-infrared photoluminescence of hexanitratoneodymate ionic liquids
Source: Royal Society of Chemistry journal article supplement (doi:10.1039/c4dt03294b), 2014-12-05

Supporting Information

## Synthesis, Structure and Near Infrared Photoluminescence of Hexanitratoneodymate Ionic Liquids

*Ling He, Shun-Ping Ji, Ning Tang, Ying Zhao, and Guo-Hong Tao\**

College of Chemistry, Sichuan University, Chengdu 610064, China

Email: [taogh@scu.edu.cn](mailto:taogh@scu.edu.cn)

### Index:

|               |                       |                                                                                                                  |
|---------------|-----------------------|------------------------------------------------------------------------------------------------------------------|
| <b>S2</b>     | <b>Figure S1-S2</b>   | Crystal Structures of <b>1</b>                                                                                   |
| <b>S3-S7</b>  | <b>Figure S3-S12</b>  | <sup>1</sup> H NMR and <sup>13</sup> C NMR Spectra of <b>1-5</b>                                                 |
| <b>S8</b>     | <b>Figure S13</b>     | IR Spectra of <b>1</b> , <b>1</b> + 1 wt% H <sub>2</sub> O, Nd(NO <sub>3</sub> ) <sub>3</sub> ·6H <sub>2</sub> O |
| <b>S9-S10</b> | <b>Figure S14-S19</b> | Excitation and Emission Spectra of <b>3-5</b>                                                                    |

**Figure S1.** Packing Diagram of **1** Viewed down the *b*-axis.

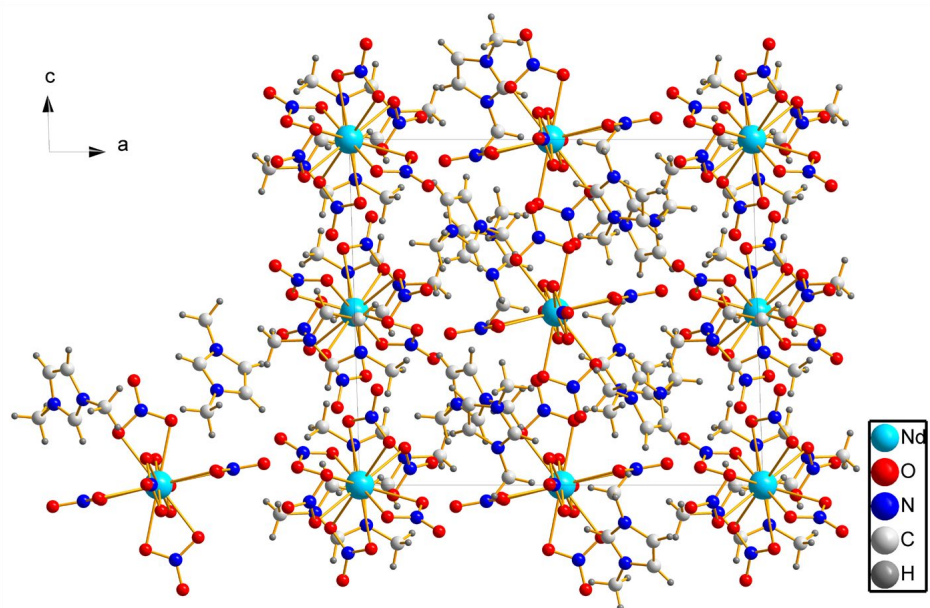

**Figure S2.** Packing Diagram of **1** Viewed down the *c*-axis.

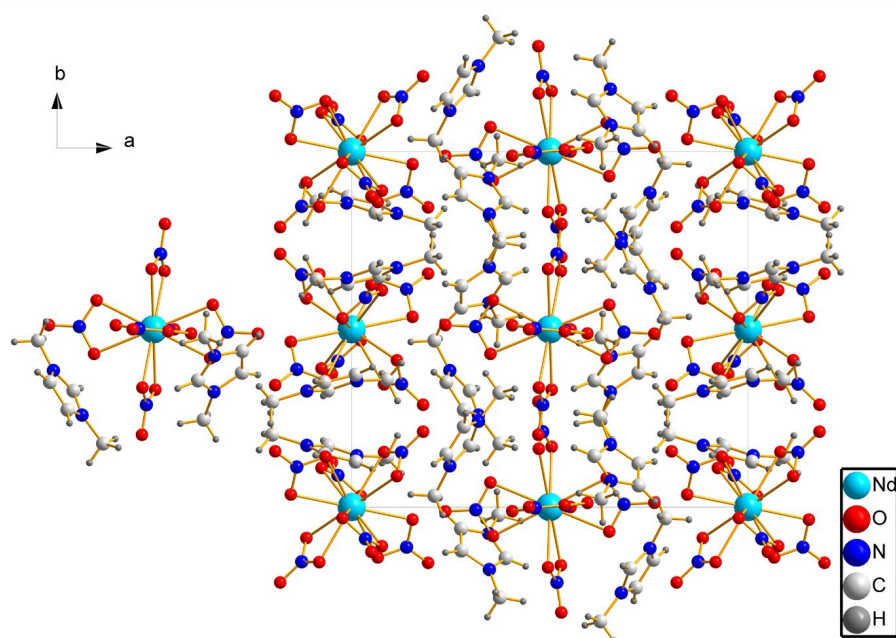

**Figure S3.**  $^1\text{H}$  NMR Spectrum of Tri(1,3-dimethylimidazolium) Hexanitratoneodymate,  $[\text{C}_1\text{mim}]_3[\text{Nd}(\text{NO}_3)_6]$ , (**1**).

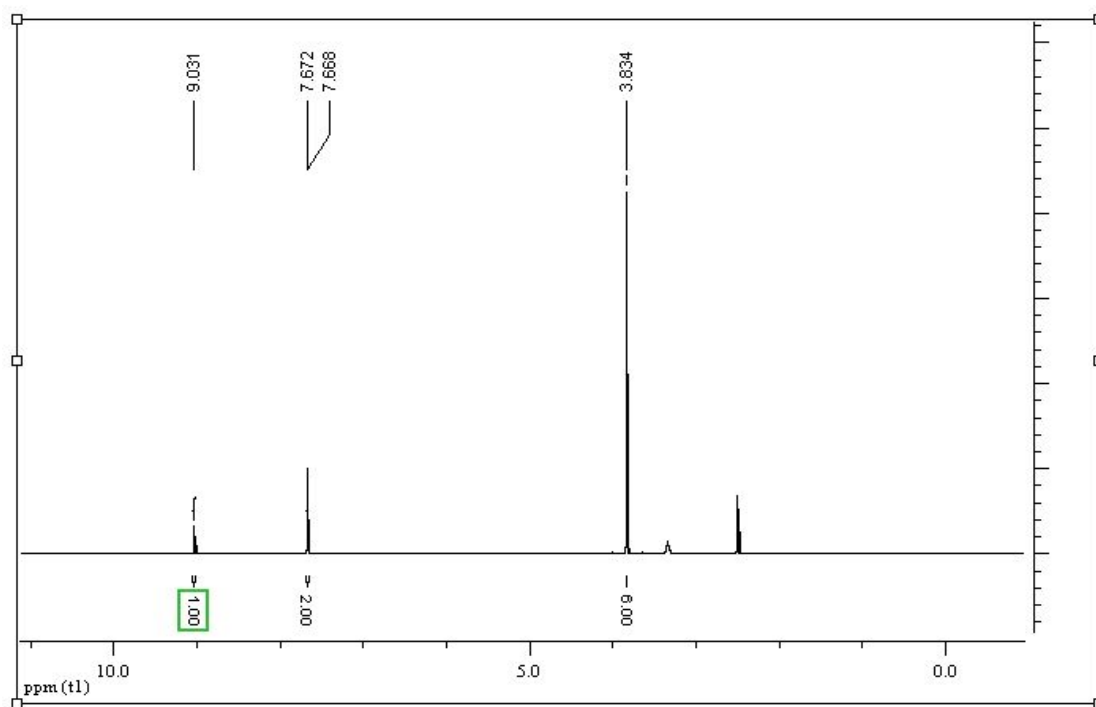

**Figure S4.**  $^{13}\text{C}$  NMR Spectrum of Tri(1,3-dimethylimidazolium) Hexanitratoneodymate,  $[\text{C}_1\text{mim}]_3[\text{Nd}(\text{NO}_3)_6]$ , (**1**).

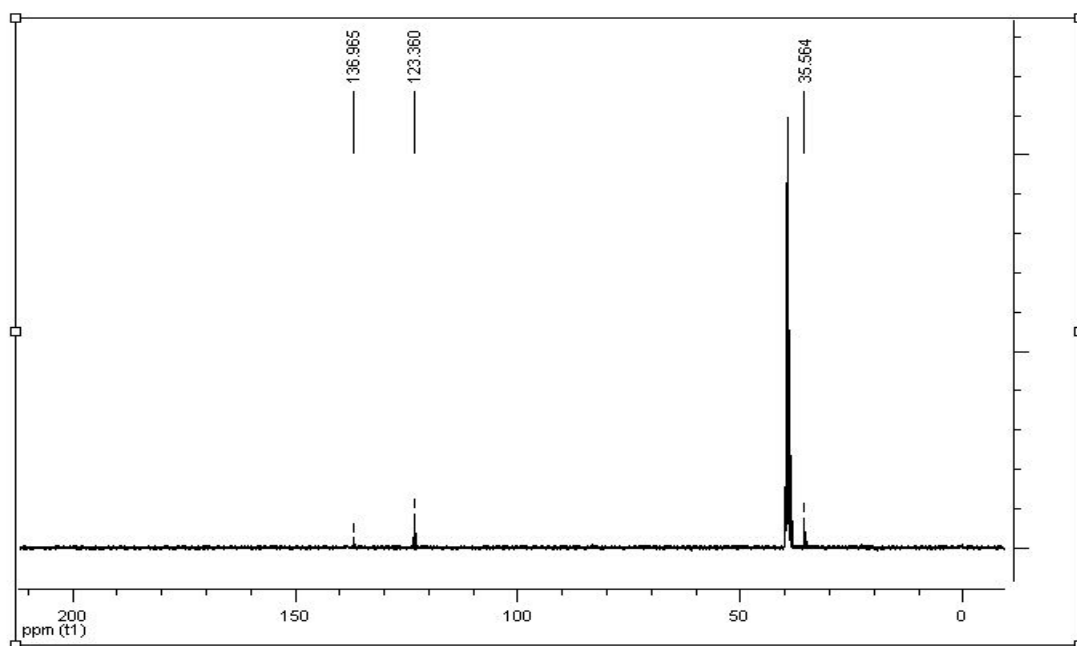

**Figure S5.**  $^1\text{H}$  NMR Spectrum of Tri(1-ethyl-3-methylimidazolium) Hexanitratoneodymate,  $[\text{C}_2\text{mim}]_3[\text{Nd}(\text{NO}_3)_6]$ , (**2**).

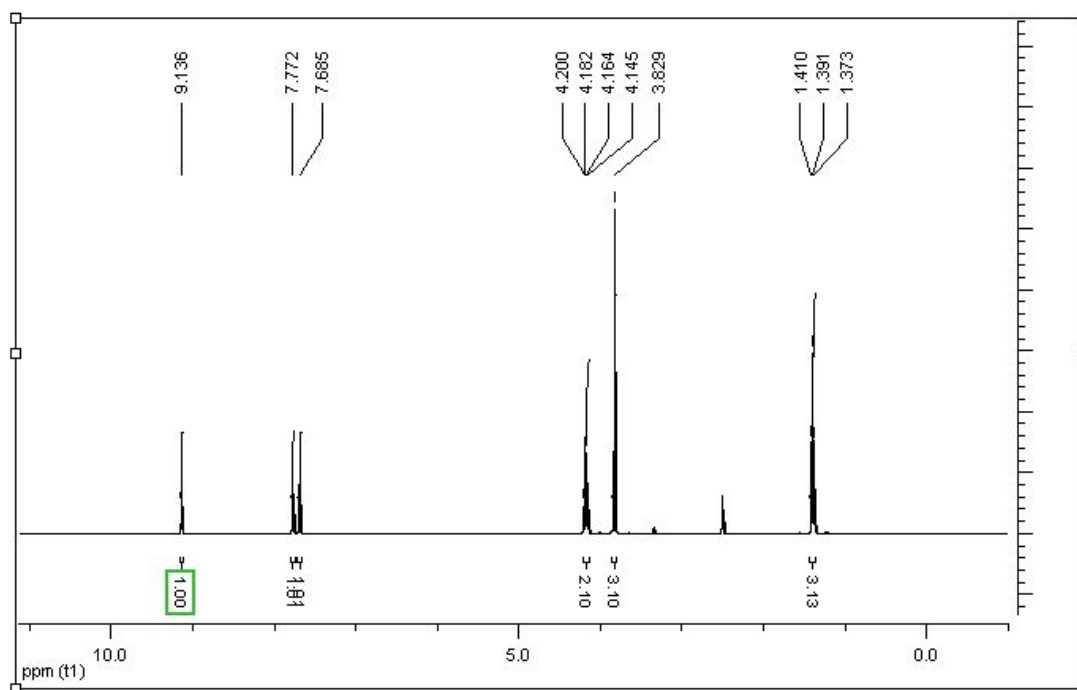

**Figure S6.**  $^{13}\text{C}$  NMR Spectrum of Tri(1-ethyl-3-methylimidazolium) Hexanitratoneodymate,  $[\text{C}_2\text{mim}]_3[\text{Nd}(\text{NO}_3)_6]$ , (**2**).

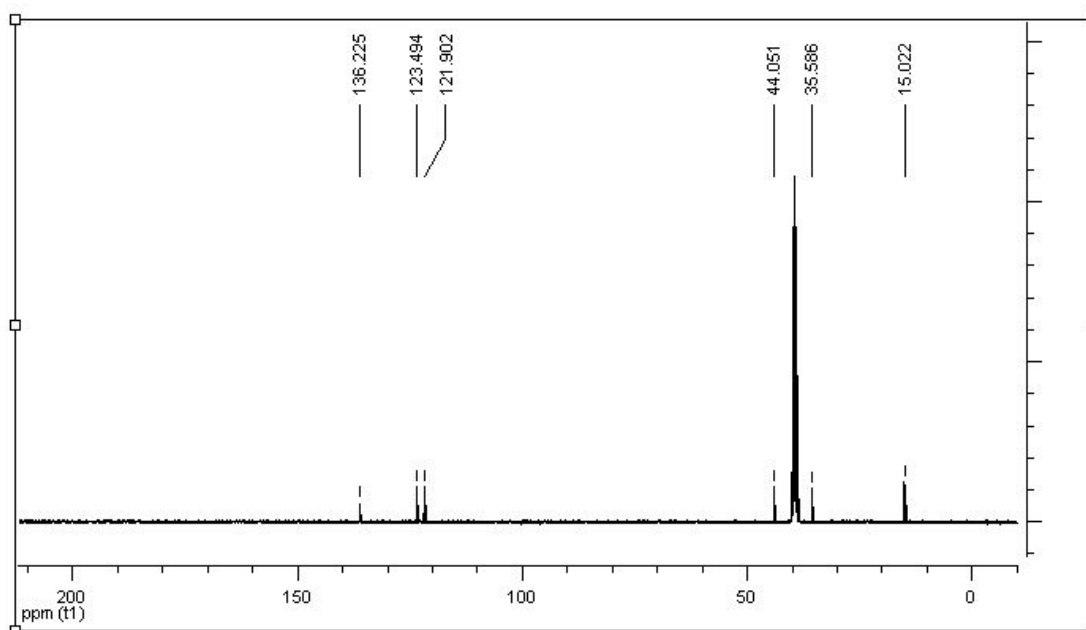



**Figure S9.**  $^1\text{H}$  NMR Spectrum of Tri(1-hexyl-3-methylimidazolium) Hexanitratoneodymate,  $[\text{C}_6\text{mim}]_3[\text{Nd}(\text{NO}_3)_6]$ , (**4**).

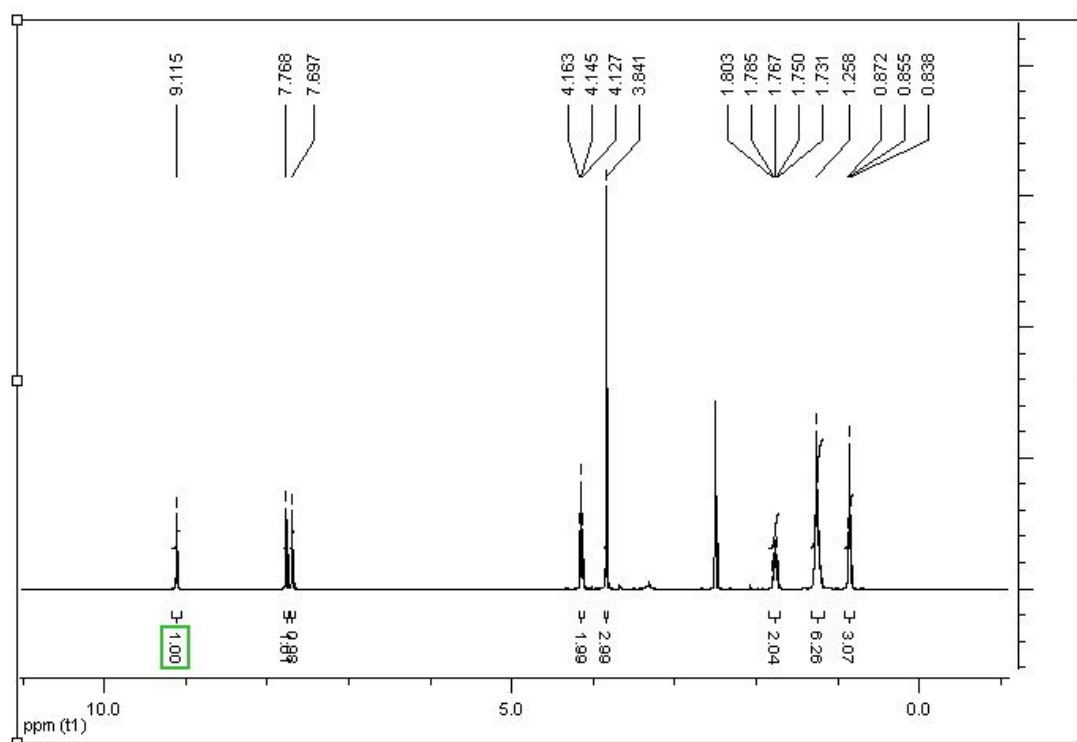

**Figure S10.**  $^{13}\text{C}$  NMR Spectrum of Tri(1-hexyl-3-methylimidazolium) Hexanitratoneodymate,  $[\text{C}_6\text{mim}]_3[\text{Nd}(\text{NO}_3)_6]$ , (**4**).

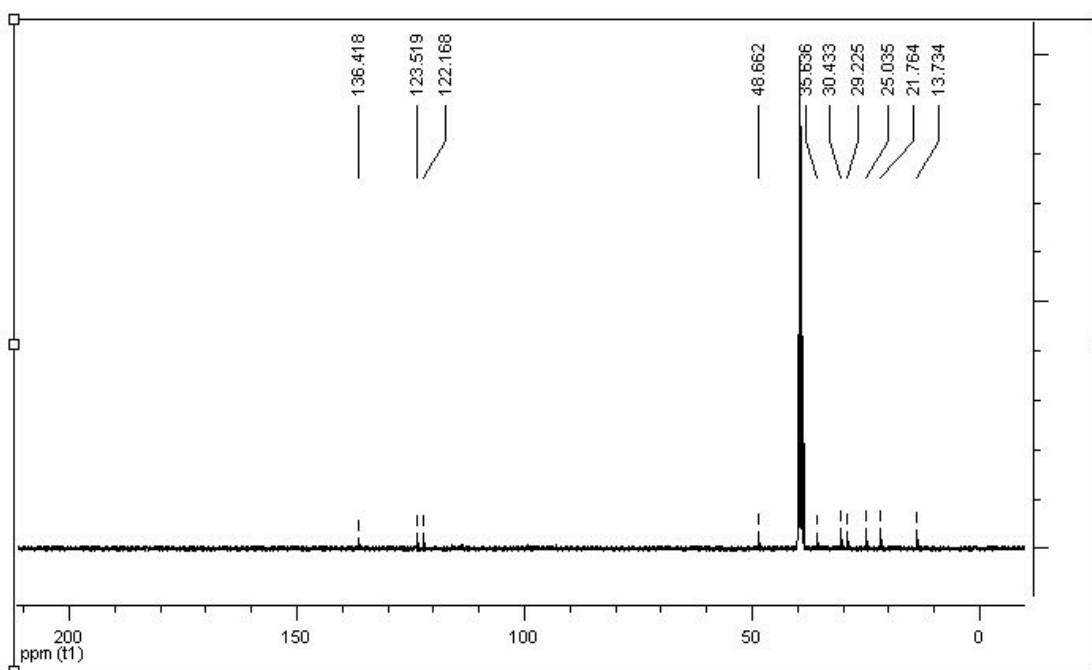

**Figure S11.**  $^1\text{H}$  NMR Spectrum of Tri(1-methyl-3-octylimidazolium) Hexanitratoneodymate,  $[\text{C}_8\text{mim}]_3[\text{Nd}(\text{NO}_3)_6]$ , (**5**).

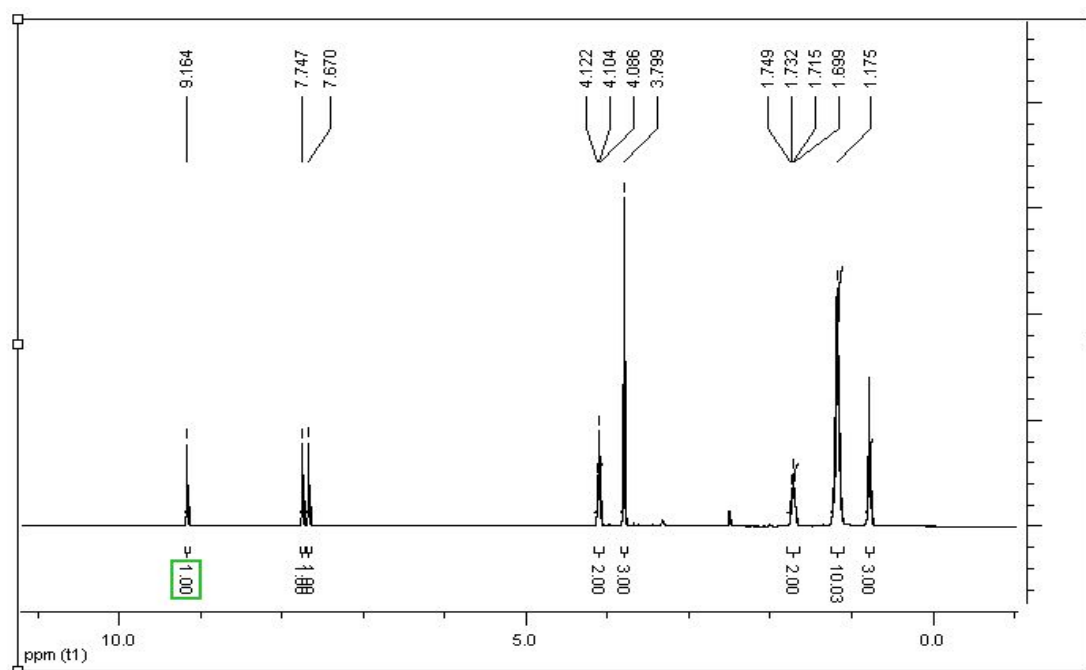

**Figure S12.**  $^{13}\text{C}$  NMR Spectrum of Tri(1-methyl-3-octylimidazolium) Hexanitratoneodymate,  $[\text{C}_8\text{mim}]_3[\text{Nd}(\text{NO}_3)_6]$ , (**5**).

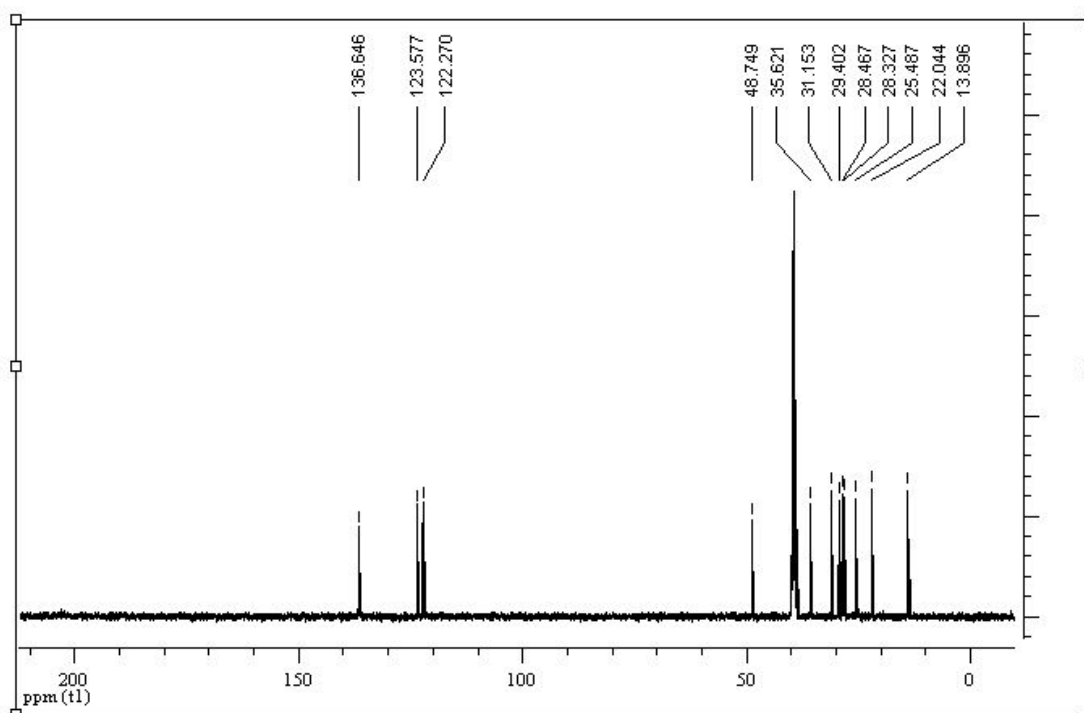

**Figure S13.** IR Spectra of **1**, **1 + 1 wt% H<sub>2</sub>O**, and **Nd(NO<sub>3</sub>)<sub>3</sub>·6H<sub>2</sub>O**.

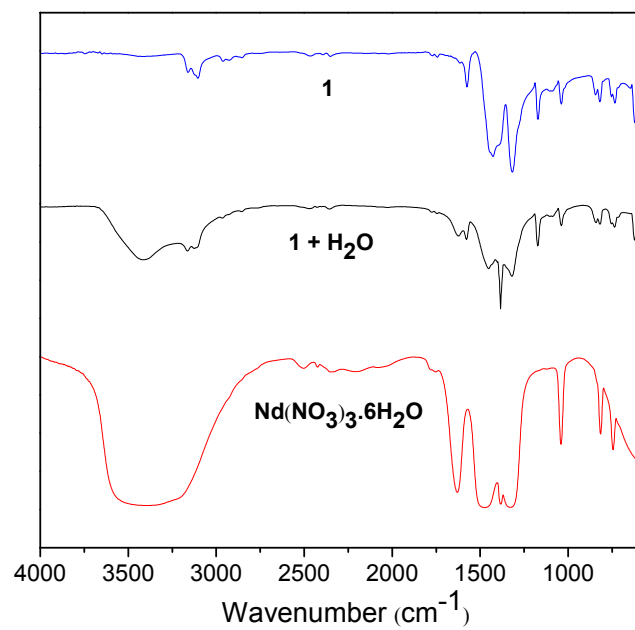



---

**Figure S14.** Excitation Spectrum of **3**.

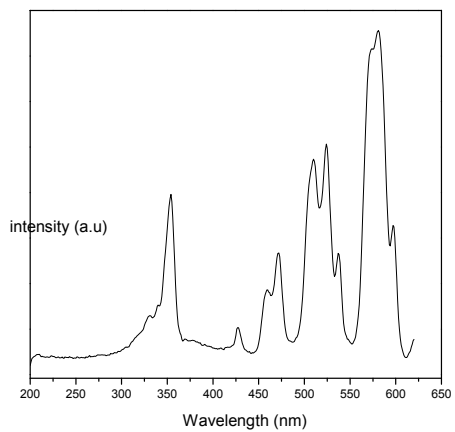

**Figure S15.** Excitation Spectrum of **4**.

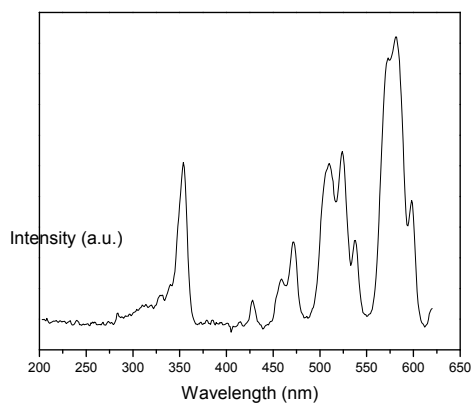

**Figure S16.** Excitation Spectrum of **5**.

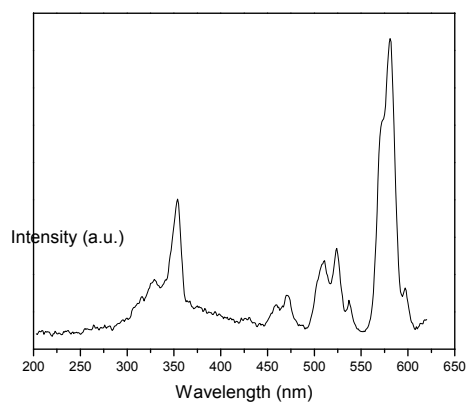

---

**Figure S17.** Emission Spectrum of **3**.

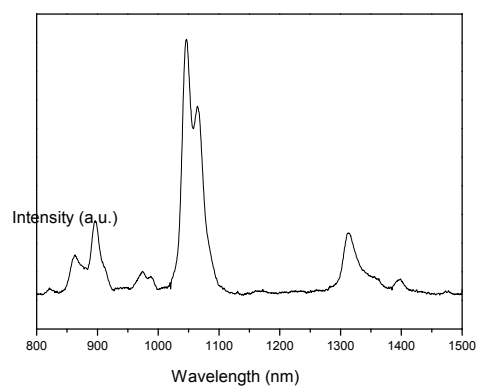

**Figure S18.** Emission Spectrum of **4**.

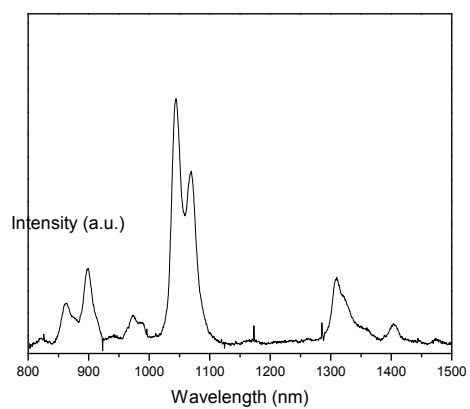

**Figure S19.** Emission Spectrum of **5**.

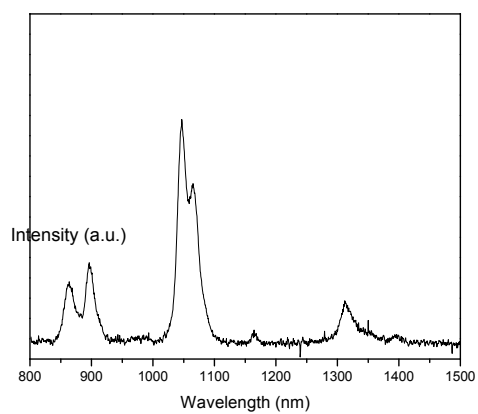

Supplement: c4dt03294b1.pdf [file c4dt03294b1.pdf]
